# Supplementary material for: Assignment of Absolute Configurations of Two Promising Anti-Helicobacter pylori Agents from the Marine Sponge-Derived Fungus Aspergillus niger L14
Source: MDPI journal article supplement (doi:10.3390/molecules26165061), 2021-08-20
Supplement: s1 [file s1]

# Assignment of absolute configurations of two promising anti-*Helicobacter pylori* agents from the marine sponge-derived fungus *Aspergillus niger* L14

Jia Liu, Ronglu Yu, Jia Jia, Wen Gu and Huawei Zhang \*

\* Correspondence:: hwzhang@zjut.edu.cn; Tel.: +86-571-8832-0913

## Contents

|                                                                                                                     |    |
|---------------------------------------------------------------------------------------------------------------------|----|
| <b>Figure S1.</b> ESI-MS spectrum of compound <b>1</b> .....                                                        | 3  |
| <b>Figure S2.</b> ESI-MS spectrum of compound <b>2</b> .....                                                        | 4  |
| <b>Figure S3.</b> <sup>1</sup> H NMR spectrum (600 MHz, CDCl <sub>3</sub> ) of compound <b>1</b> .....              | 5  |
| <b>Figure S4.</b> <sup>13</sup> C NMR spectrum (150 MHz, CDCl <sub>3</sub> ) of compound <b>1</b> .....             | 6  |
| <b>Figure S5.</b> <sup>1</sup> H NMR spectrum (600 MHz, CDCl <sub>3</sub> ) of compound <b>2</b> .....              | 7  |
| <b>Figure S6.</b> <sup>13</sup> C NMR spectrum (150 MHz, CDCl <sub>3</sub> ) of compound <b>2</b> .....             | 8  |
| <b>Figure S7.</b> Crystal shapes of compounds <b>1</b> and <b>2</b> .....                                           | 9  |
| <b>Table S1.</b> Selected crystallographic data and refinement parameters for compounds <b>1</b> and <b>2</b> ..... | 10 |

|                                                                                                                                                                   |    |
|-------------------------------------------------------------------------------------------------------------------------------------------------------------------|----|
| <b>Table S2.</b> Atomic coordinates ( $\times 10^4$ ) and equivalent isotropic displacement parameters ( $\text{\AA}^2 \times 10^3$ ) for compound <b>1</b> ..... | 11 |
| <b>Table S3.</b> Bond lengths [ $\text{\AA}$ ] and angles [ $^\circ$ ] for compound <b>1</b> .....                                                                | 12 |
| <b>Table S4.</b> Hydrogen coordinates ( $\times 10^4$ ) and isotropic displacement parameters ( $\text{\AA}^2 \times 10^3$ ) for compound <b>1</b> .....          | 15 |
| <b>Table S5.</b> Atomic coordinates ( $\times 10^4$ ) and equivalent isotropic displacement parameters ( $\text{\AA}^2 \times 10^3$ ) for compound <b>2</b> ..... | 16 |
| <b>Table S6.</b> Bond lengths [ $\text{\AA}$ ] and angles [ $^\circ$ ] for compound <b>2</b> .....                                                                | 17 |
| <b>Table S7.</b> Hydrogen coordinates ( $\times 10^4$ ) and isotropic displacement parameters ( $\text{\AA}^2 \times 10^3$ ) for compound <b>2</b> .....          | 20 |

YRL-H5 #73-97 RT: 0.40-0.53 AV: 13 NL: 1.41E3  
F: ITMS + c ESI Full ms [50.00-1200.00]

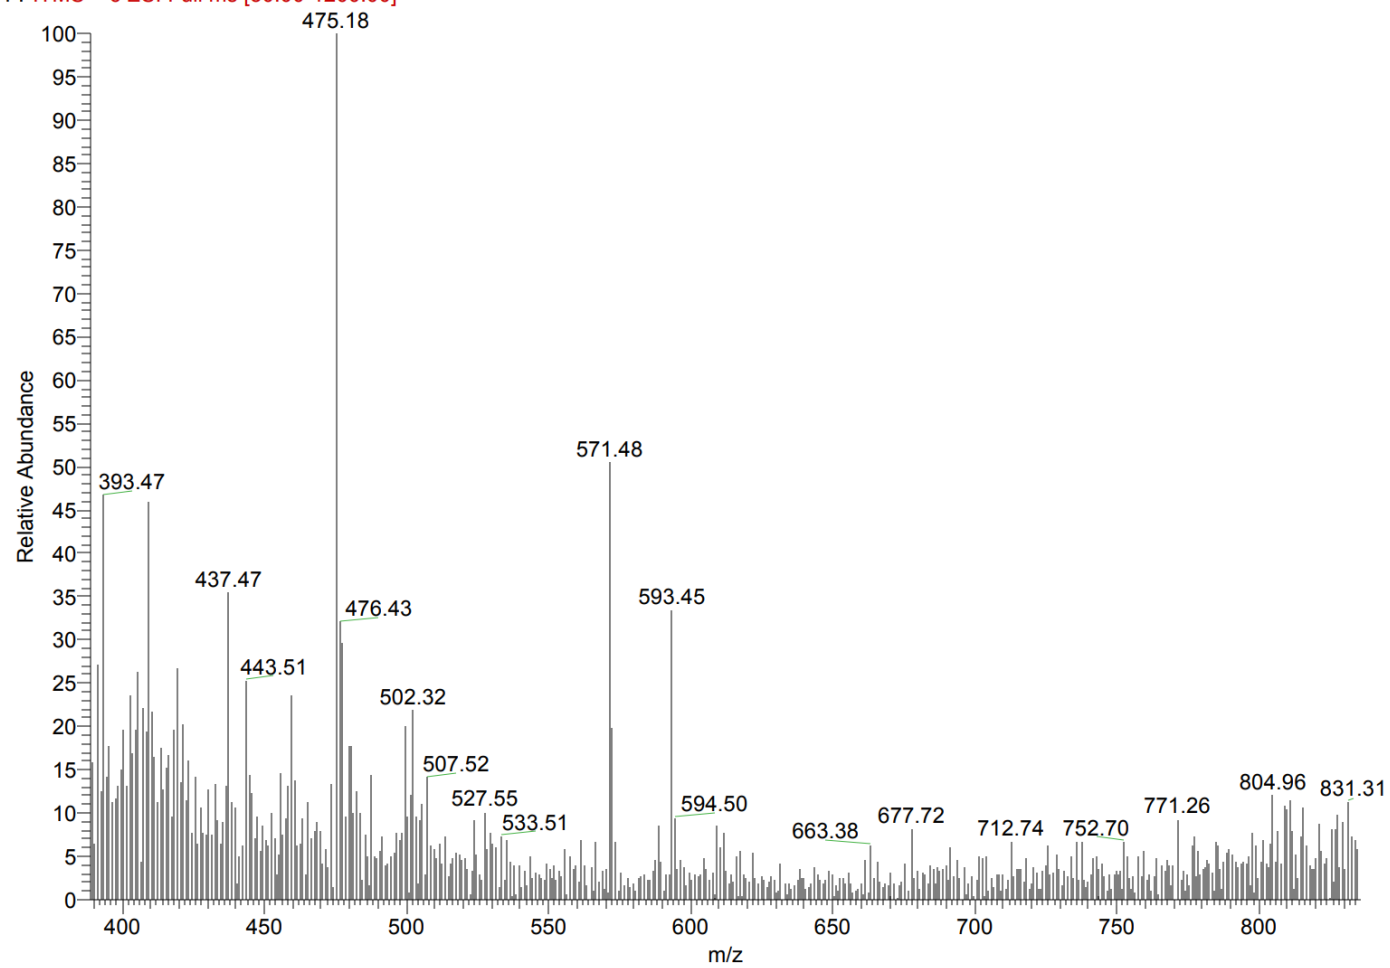

Figure S1. ESI-MS spectrum of compound 1.

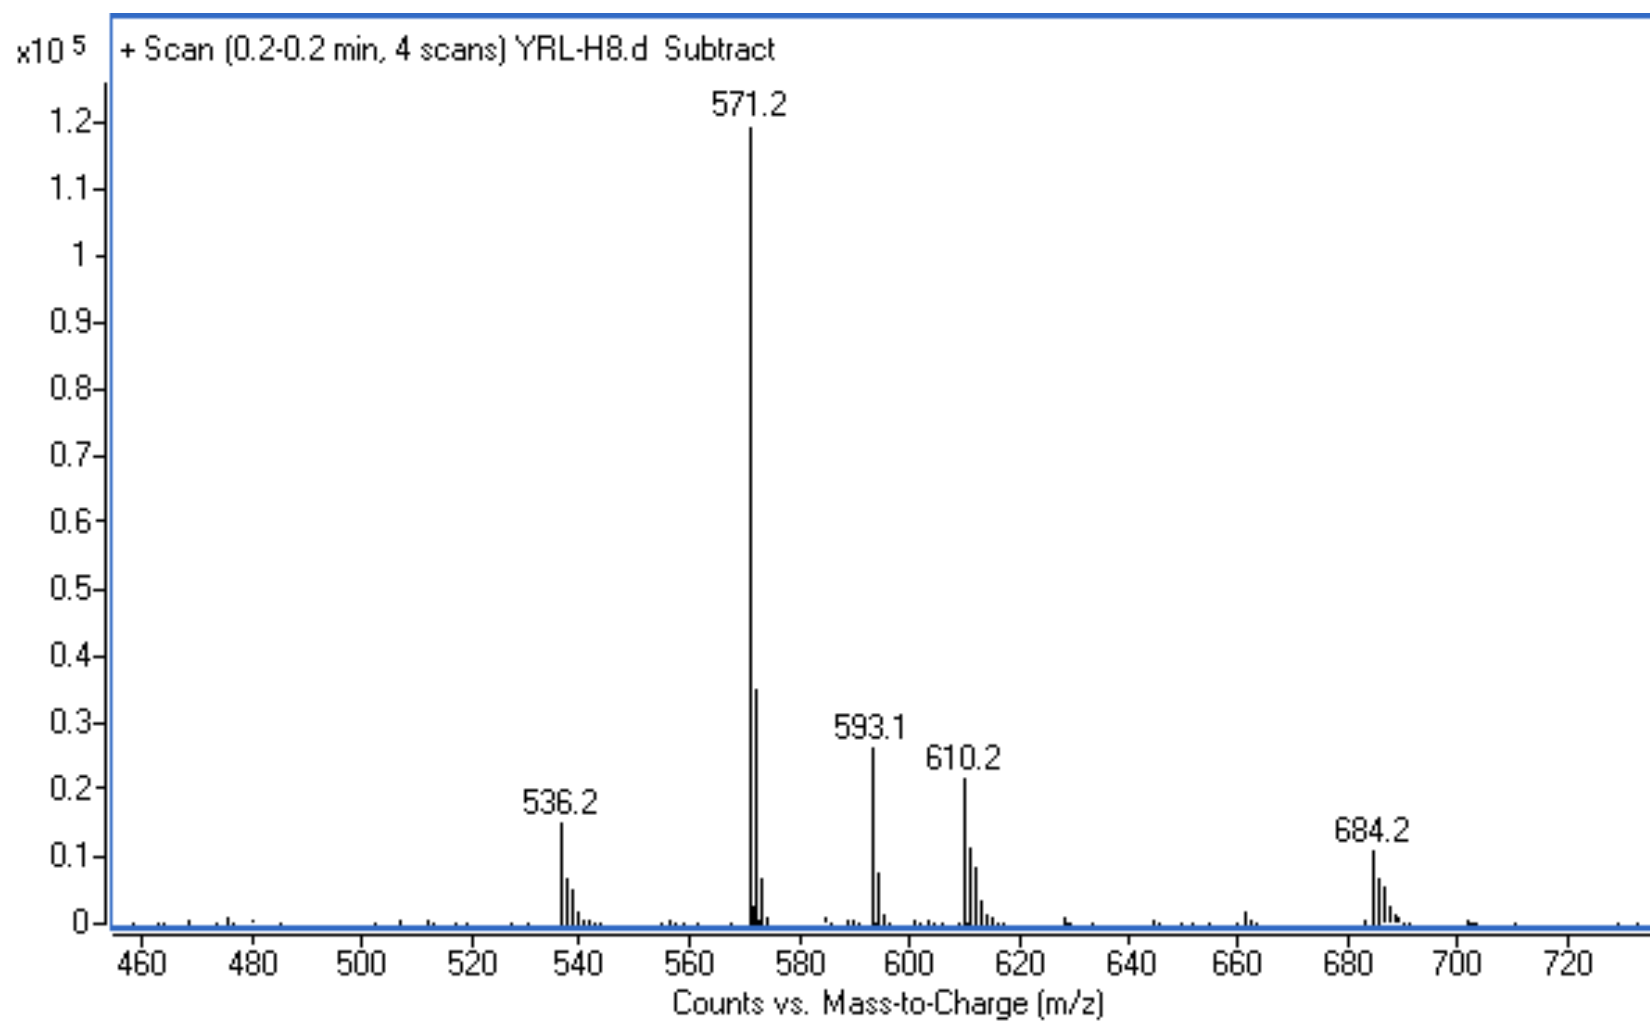

Figure S2. ESI-MS spectrum of compound 2.

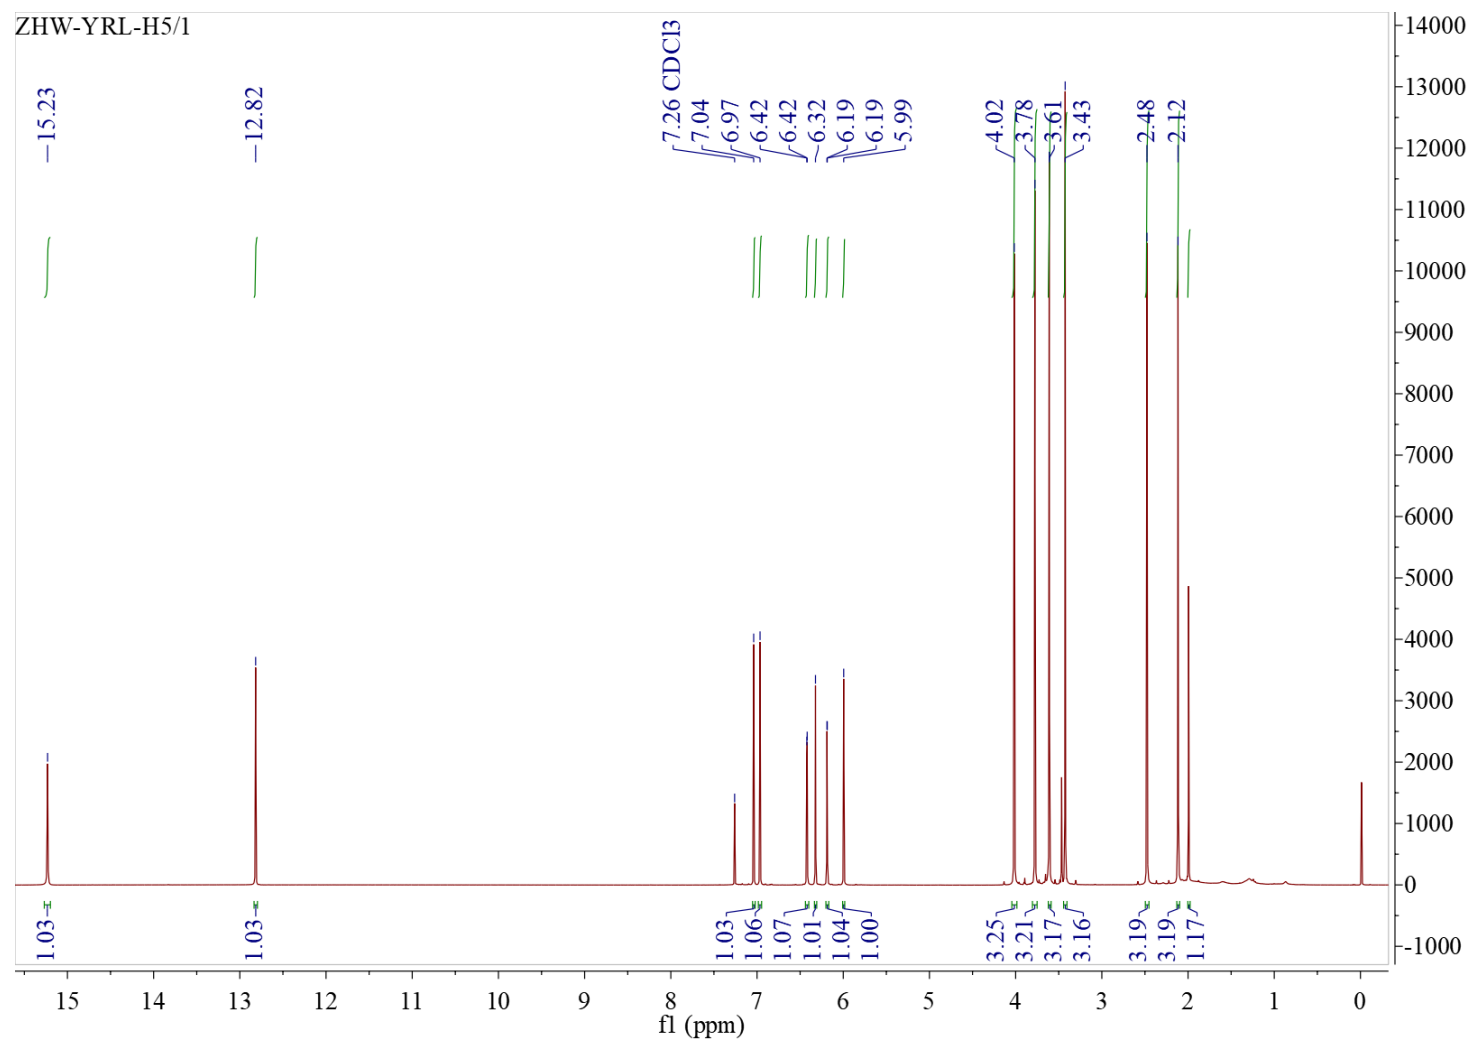

Figure S3. <sup>1</sup>H NMR spectrum (600 MHz, CDCl<sub>3</sub>) of compound 1.

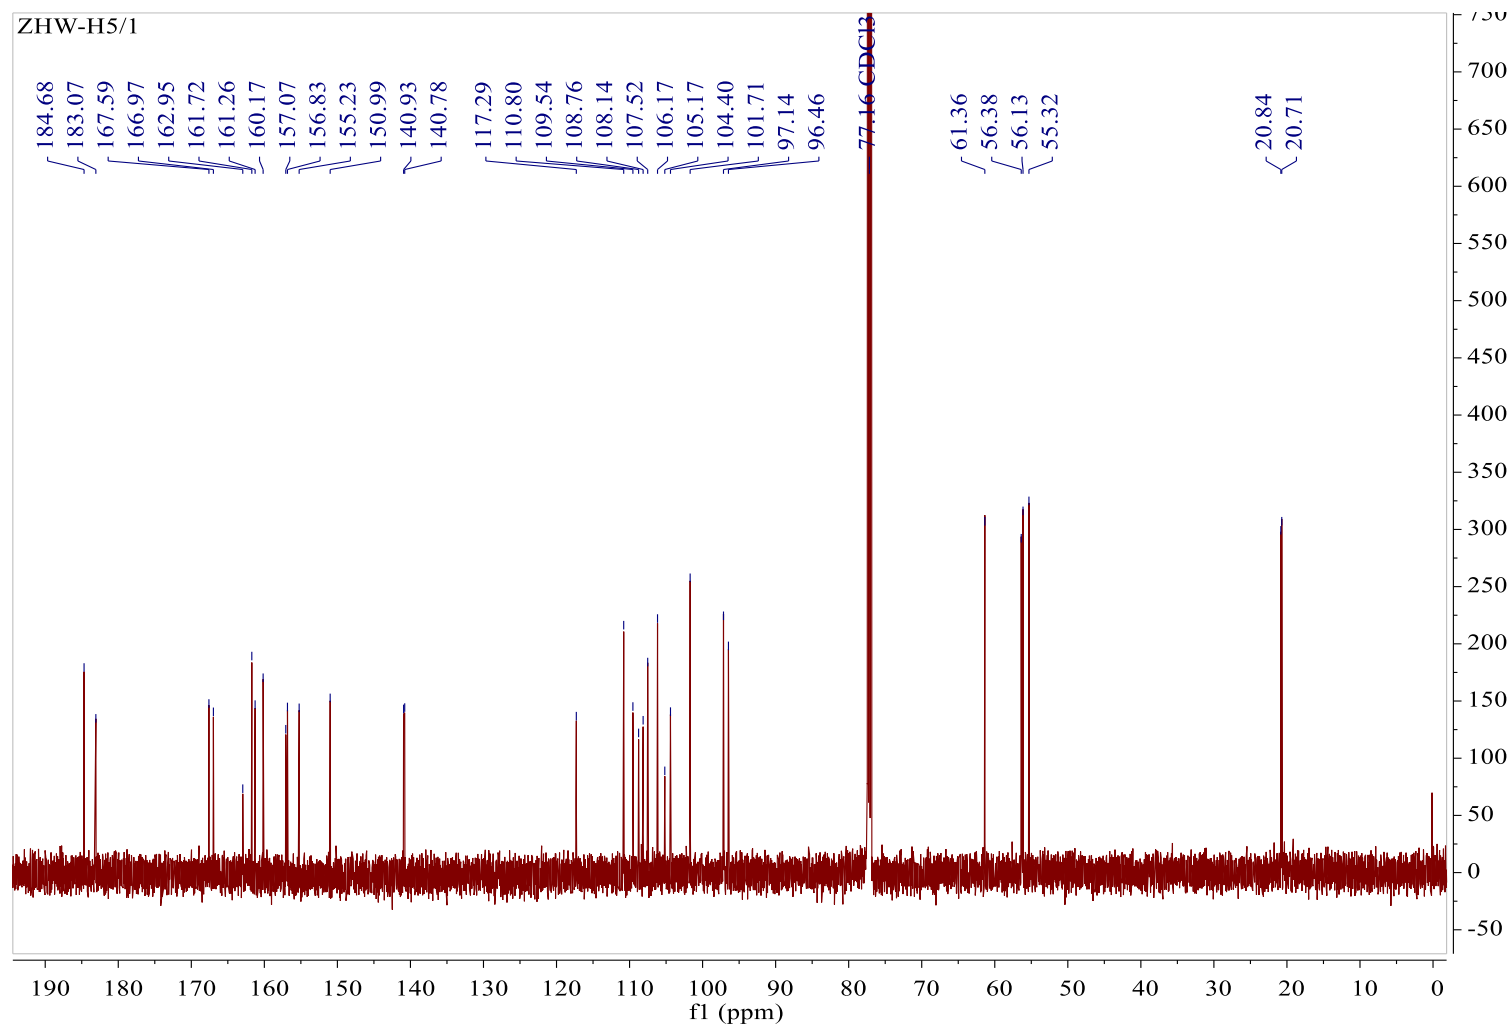

**Figure S4.**  $^{13}\text{C}$  NMR spectrum (150 MHz,  $\text{CDCl}_3$ ) of compound **1**.

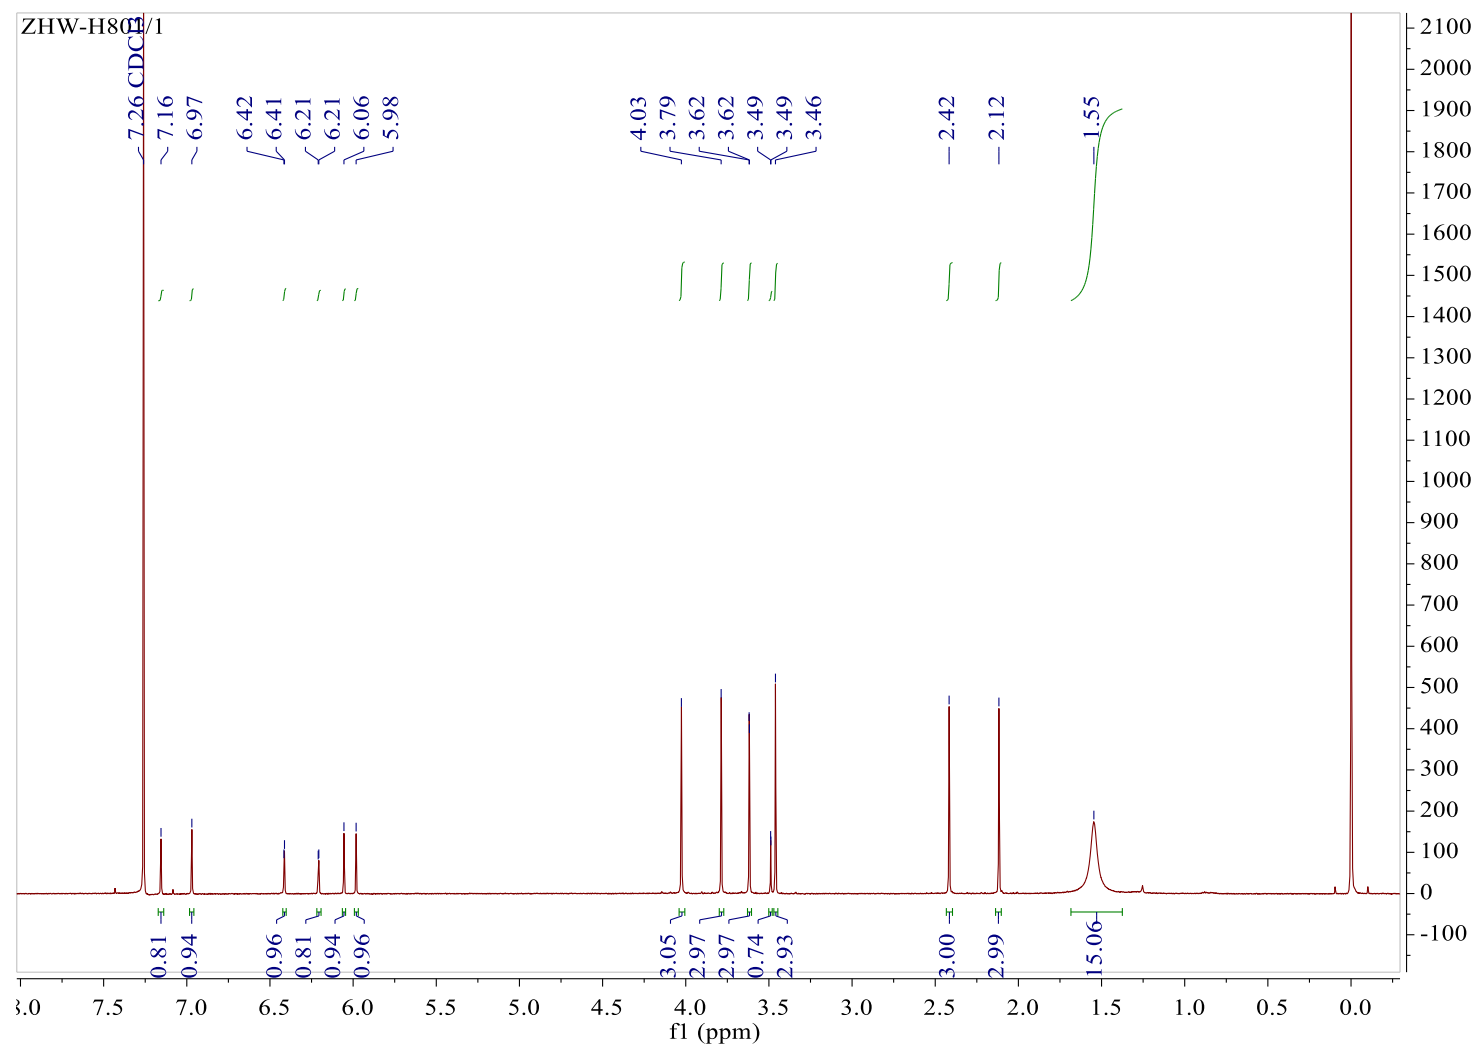

Figure S5.  $^1\text{H}$  NMR spectrum (600 MHz,  $\text{CDCl}_3$ ) of compound 2.

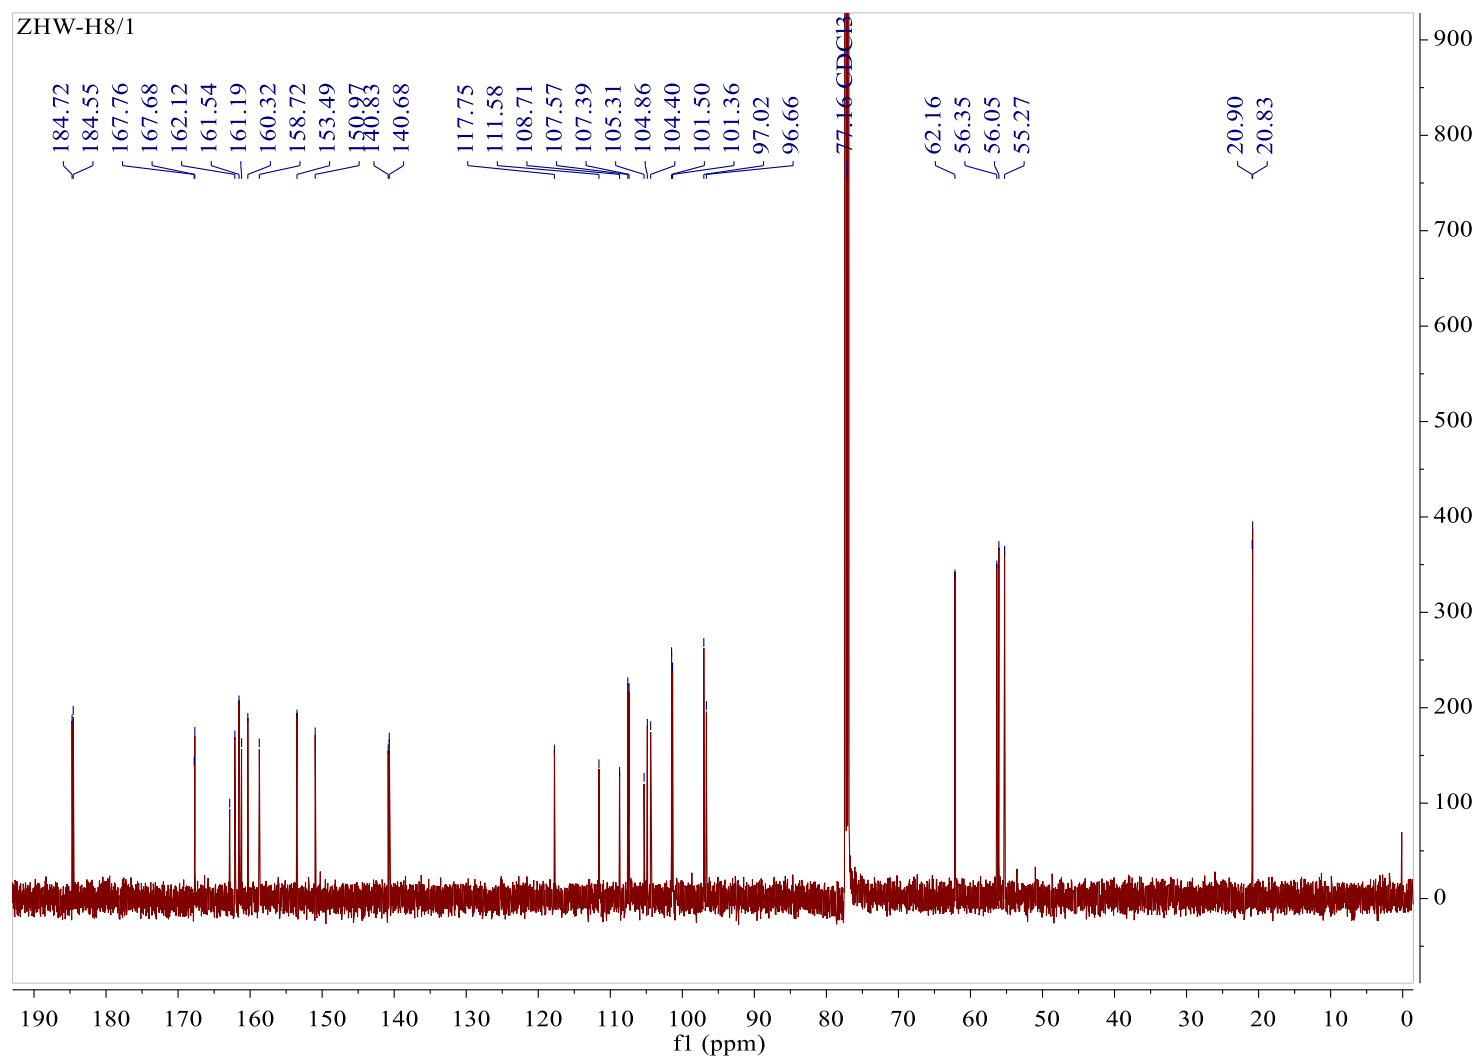

**Figure S6.**  $^{13}\text{C}$  NMR spectrum (150 MHz,  $\text{CDCl}_3$ ) of compound **2**.



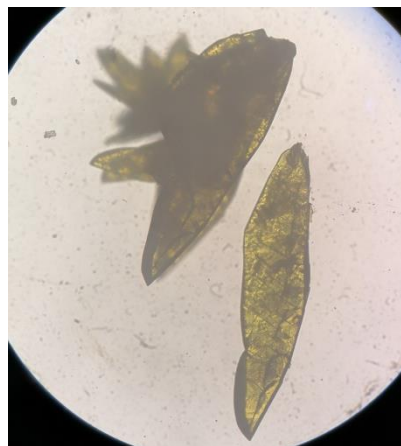

1

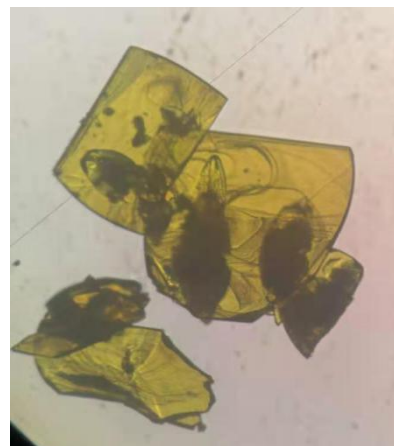

2

**Figure S7.** Crystal shapes of compounds 1 and 2.

**Table S1.** Selected crystallographic data and refinement parameters for compounds **1** and **2**.

| Compound<br>parameters                               | <b>1</b>                                                        | <b>2</b>                                                        |
|------------------------------------------------------|-----------------------------------------------------------------|-----------------------------------------------------------------|
| Formula weight                                       | 634.61                                                          | 570.53                                                          |
| Temperature (K)                                      | 173.01                                                          | 193                                                             |
| Crystal color                                        | yellow                                                          | yellow                                                          |
| Crystal size (mm <sup>3</sup> )                      | 0.05 × 0.03 × 0.01                                              | 0.05 × 0.05 × 0.01                                              |
| Crystal system                                       | triclinic                                                       | monoclinic                                                      |
| Space group                                          | P-1                                                             | P2 <sub>1</sub> /c                                              |
| <i>a</i> /Å                                          | 8.0417(7)                                                       | 11.7688(5)                                                      |
| <i>b</i> /Å                                          | 11.9593(10)                                                     | 13.7141(7)                                                      |
| <i>c</i> /Å                                          | 17.1410(15)                                                     | 17.5181(8)                                                      |
| <i>α</i> /°                                          | 97.364(6)                                                       | 90                                                              |
| <i>β</i> /°                                          | 100.693(6)                                                      | 109.295(3)                                                      |
| <i>γ</i> /°                                          | 104.037(5)                                                      | 90                                                              |
| <i>V</i> (Å <sup>3</sup> )                           | 1545.4                                                          | 2668.6                                                          |
| <i>Z</i>                                             | 2                                                               | 4                                                               |
| <i>ρ</i> <sub>calc</sub> (g/cm <sup>3</sup> )        | 1.364                                                           | 1.420                                                           |
| <i>μ</i> /mm <sup>-1</sup>                           | 0.558                                                           | 0.570                                                           |
| <i>F</i> (000)                                       | 668.0                                                           | 1192.0                                                          |
| Radiation                                            | GaKα (λ = 1.34139)                                              | GaKα (λ = 1.34139)                                              |
| Range of <i>h</i> , <i>k</i> and <i>l</i>            | -9 ≤ <i>h</i> ≤ 9, -13 ≤ <i>k</i> ≤ 14, -20 ≤ <i>l</i> ≤ 20     | -14 ≤ <i>h</i> ≤ 9, -16 ≤ <i>k</i> ≤ 16, -21 ≤ <i>l</i> ≤ 20    |
| Goodness-of-fit on <i>F</i> <sup>2</sup>             | 1.023                                                           | 1.042                                                           |
| Final <i>R</i> indexes [ <i>I</i> ≥ 2σ ( <i>I</i> )] | <i>R</i> <sub>1</sub> = 0.0956, <i>wR</i> <sub>2</sub> = 0.2537 | <i>R</i> <sub>1</sub> = 0.0508, <i>wR</i> <sub>2</sub> = 0.1356 |
| Final <i>R</i> indexes [all data]                    | <i>R</i> <sub>1</sub> = 0.1535, <i>wR</i> <sub>2</sub> = 0.3083 | <i>R</i> <sub>1</sub> = 0.0669, <i>wR</i> <sub>2</sub> = 0.1499 |

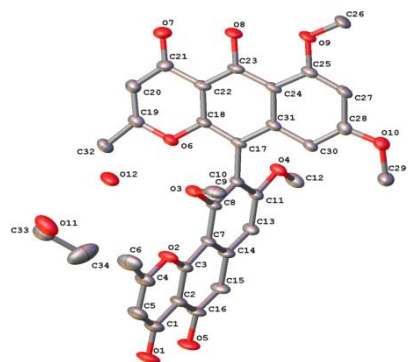

**Table S2.** Atomic coordinates ( $\times 10^4$ ) and equivalent isotropic displacement parameters ( $\text{\AA}^2 \times 10^3$ ) for compound **1**.

|       | <i>x</i> | <i>y</i> | <i>z</i> | U(eq)* |
|-------|----------|----------|----------|--------|
| O(1)  | 2566(5)  | 2228(3)  | 3812(2)  | 84(1)  |
| O(2)  | 6316(4)  | 3297(3)  | 5896(1)  | 58(1)  |
| O(3)  | 7445(3)  | 4461(2)  | 7387(1)  | 45(1)  |
| O(4)  | 4744(3)  | 7329(2)  | 8231(1)  | 47(1)  |
| O(5)  | 971(4)   | 3651(3)  | 4318(2)  | 75(1)  |
| O(6)  | 5612(3)  | 4349(2)  | 8784(1)  | 47(1)  |
| O(7)  | 8398(4)  | 4720(3)  | 11090(2) | 61(1)  |
| O(8)  | 10342(4) | 6633(3)  | 10944(1) | 55(1)  |
| O(9)  | 12163(3) | 8614(2)  | 10735(1) | 53(1)  |
| O(10) | 10497(4) | 10071(3) | 8375(2)  | 60(1)  |
| C(1)  | 3737(6)  | 2557(4)  | 4460(2)  | 66(1)  |
| C(2)  | 3661(6)  | 3471(4)  | 5086(2)  | 54(1)  |
| C(3)  | 4985(5)  | 3814(4)  | 5792(2)  | 47(1)  |
| C(4)  | 6395(7)  | 2429(4)  | 5315(2)  | 68(1)  |
| C(5)  | 5157(7)  | 2054(5)  | 4620(3)  | 72(1)  |
| C(6)  | 7956(8)  | 1989(6)  | 5567(3)  | 94(2)  |
| C(7)  | 4974(5)  | 4703(3)  | 6431(2)  | 43(1)  |
| C(8)  | 6198(4)  | 5048(3)  | 7192(2)  | 41(1)  |
| C(9)  | 9114(5)  | 4950(5)  | 7219(2)  | 63(1)  |
| C(10) | 6102(4)  | 5918(3)  | 7783(2)  | 41(1)  |
| C(11) | 4739(5)  | 6485(3)  | 7623(2)  | 42(1)  |
| C(12) | 3313(6)  | 7840(4)  | 8129(3)  | 62(1)  |
| C(13) | 3531(5)  | 6161(3)  | 6896(2)  | 48(1)  |
| C(14) | 3608(5)  | 5258(4)  | 6299(2)  | 48(1)  |
| C(15) | 2275(5)  | 4910(4)  | 5572(2)  | 57(1)  |
| C(16) | 2288(5)  | 4029(4)  | 4994(2)  | 56(1)  |
| C(17) | 7278(4)  | 6165(3)  | 8604(2)  | 41(1)  |
| C(18) | 6977(4)  | 5345(3)  | 9099(2)  | 40(1)  |
| C(19) | 5153(5)  | 3531(4)  | 9256(2)  | 50(1)  |
| C(20) | 6042(5)  | 3641(4)  | 10009(2) | 51(1)  |
| C(21) | 7516(5)  | 4611(4)  | 10384(2) | 49(1)  |
| C(22) | 8009(5)  | 5506(4)  | 9890(2)  | 45(1)  |
| C(23) | 9357(5)  | 6504(3)  | 10184(2) | 45(1)  |
| C(24) | 9749(4)  | 7411(3)  | 9720(2)  | 43(1)  |
| C(25) | 11090(5) | 8475(3)  | 9990(2)  | 44(1)  |
| C(26) | 13619(5) | 9633(4)  | 10976(2) | 58(1)  |
| C(27) | 11298(5) | 9322(4)  | 9524(2)  | 49(1)  |
| C(28) | 10180(5) | 9134(3)  | 8750(2)  | 46(1)  |
| C(29) | 9281(6)  | 10017(4) | 7642(3)  | 64(1)  |
| C(30) | 8910(5)  | 8105(3)  | 8432(2)  | 43(1)  |
| C(31) | 8633(4)  | 7219(3)  | 8916(2)  | 40(1)  |
| C(32) | 3619(5)  | 2557(4)  | 8790(2)  | 57(1)  |
| O(11) | 4640(6)  | 125(4)   | 6722(3)  | 105(1) |
| C(33) | 2902(7)  | 134(5)   | 6720(3)  | 82(2)  |
| C(34) | 2412(10) | 1152(9)  | 6280(4)  | 142(3) |

|       |         |         |         |       |
|-------|---------|---------|---------|-------|
| O(12) | 6899(5) | 2151(3) | 7672(2) | 77(1) |
|-------|---------|---------|---------|-------|

\*: U(eq) is defined as one third of the trace of the orthogonalized  $U^{ij}$  tensor.

**Table S3.** Bond lengths [Å] and angles [°] for compound 1.

| Bond lengths [Å] |          | Bond angles [°]     |          |
|------------------|----------|---------------------|----------|
| O(1)-C(1)        | 1.263(4) | C(3)-O(2)-C(4)      | 121.0(3) |
| O(2)-C(3)        | 1.355(4) | C(8)-O(3)-C(9)      | 115.5(3) |
| O(2)-C(4)        | 1.365(5) | C(11)-O(4)-C(12)    | 117.1(3) |
| O(3)-C(8)        | 1.374(4) | C(16)-O(5)-H(5)     | 109.5    |
| O(3)-C(9)        | 1.426(5) | C(19)-O(6)-C(18)    | 120.2(3) |
| O(4)-C(11)       | 1.353(4) | C(23)-O(8)-H(8)     | 109.5    |
| O(4)-C(12)       | 1.423(4) | C(25)-O(9)-C(26)    | 117.0(3) |
| O(5)-H(5)        | 0.8400   | C(28)-O(10)-C(29)   | 116.9(3) |
| O(5)-C(16)       | 1.358(4) | O(1)-C(1)-C(2)      | 120.8(4) |
| O(6)-C(18)       | 1.377(4) | O(1)-C(1)-C(5)      | 122.4(4) |
| O(6)-C(19)       | 1.373(5) | C(5)-C(1)-C(2)      | 116.8(3) |
| O(7)-C(21)       | 1.258(4) | C(3)-C(2)-C(1)      | 119.0(4) |
| O(8)-H(8)        | 0.8400   | C(3)-C(2)-C(16)     | 119.4(4) |
| O(8)-C(23)       | 1.361(4) | C(16)-C(2)-C(1)     | 121.6(3) |
| O(9)-C(25)       | 1.368(4) | O(2)-C(3)-C(2)      | 120.6(3) |
| O(9)-C(26)       | 1.424(5) | O(2)-C(3)-C(7)      | 117.9(3) |
| O(10)-C(28)      | 1.357(5) | C(2)-C(3)-C(7)      | 121.5(3) |
| O(10)-C(29)      | 1.425(4) | O(2)-C(4)-C(6)      | 111.2(3) |
| C(1)-C(2)        | 1.451(6) | C(5)-C(4)-O(2)      | 121.4(4) |
| C(1)-C(5)        | 1.415(6) | C(5)-C(4)-C(6)      | 127.4(4) |
| C(2)-C(3)        | 1.396(4) | C(1)-C(5)-H(5A)     | 119.4    |
| C(2)-C(16)       | 1.418(6) | C(4)-C(5)-C(1)      | 121.2(4) |
| C(3)-C(7)        | 1.428(5) | C(4)-C(5)-H(5A)     | 119.4    |
| C(4)-C(5)        | 1.348(6) | C(4)-C(6)-H(6A)     | 109.5    |
| C(4)-C(6)        | 1.489(6) | C(4)-C(6)-H(6B)     | 109.5    |
| C(5)-H(5A)       | 0.9500   | C(4)-C(6)-H(6C)     | 109.5    |
| C(6)-H(6A)       | 0.9800   | H(6A)-C(6)-H(6B)    | 109.5    |
| C(6)-H(6B)       | 0.9800   | H(6A)-C(6)-H(6C)    | 109.5    |
| C(6)-H(6C)       | 0.9800   | H(6B)-C(6)-H(6C)    | 109.5    |
| C(7)-C(8)        | 1.424(4) | C(8)-C(7)-C(3)      | 125.2(3) |
| C(7)-C(14)       | 1.413(5) | C(14)-C(7)-C(3)     | 116.9(3) |
| C(8)-C(10)       | 1.383(5) | C(14)-C(7)-C(8)     | 117.9(3) |
| C(9)-H(9A)       | 0.9800   | O(3)-C(8)-C(7)      | 120.6(3) |
| C(9)-H(9B)       | 0.9800   | O(3)-C(8)-C(10)     | 117.3(3) |
| C(9)-H(9C)       | 0.9800   | C(10)-C(8)-C(7)     | 121.9(3) |
| C(10)-C(11)      | 1.426(5) | O(3)-C(9)-H(9A)     | 109.5    |
| C(10)-C(17)      | 1.491(4) | O(3)-C(9)-H(9B)     | 109.5    |
| C(11)-C(13)      | 1.375(4) | O(3)-C(9)-H(9C)     | 109.5    |
| C(12)-H(12A)     | 0.9800   | H(9A)-C(9)-H(9B)    | 109.5    |
| C(12)-H(12B)     | 0.9800   | H(9A)-C(9)-H(9C)    | 109.5    |
| C(12)-H(12C)     | 0.9800   | H(9B)-C(9)-H(9C)    | 109.5    |
| C(13)-H(13)      | 0.9500   | C(8)-C(10)-C(11)    | 118.8(3) |
| C(13)-C(14)      | 1.411(5) | C(8)-C(10)-C(17)    | 120.4(3) |
| C(14)-C(15)      | 1.426(4) | C(11)-C(10)-C(17)   | 120.5(3) |
| C(15)-H(15)      | 0.9500   | O(4)-C(11)-C(10)    | 115.1(3) |
| C(15)-C(16)      | 1.354(6) | O(4)-C(11)-C(13)    | 124.5(3) |
| C(17)-C(18)      | 1.384(5) | C(13)-C(11)-C(10)   | 120.5(3) |
| C(17)-C(31)      | 1.417(5) | O(4)-C(12)-H(12A)   | 109.5    |
| C(18)-C(22)      | 1.414(4) | O(4)-C(12)-H(12B)   | 109.5    |
| C(19)-C(20)      | 1.328(5) | O(4)-C(12)-H(12C)   | 109.5    |
| C(19)-C(32)      | 1.489(6) | H(12A)-C(12)-H(12B) | 109.5    |
| C(20)-H(20)      | 0.9500   | H(12A)-C(12)-H(12C) | 109.5    |
| C(20)-C(21)      | 1.422(6) | H(12B)-C(12)-H(12C) | 109.5    |
| C(21)-C(22)      | 1.475(6) | C(11)-C(13)-H(13)   | 119.6    |
| C(22)-C(23)      | 1.367(6) | C(11)-C(13)-C(14)   | 120.7(3) |

|              |          |                     |          |
|--------------|----------|---------------------|----------|
| C(23)-C(24)  | 1.435(6) | C(14)-C(13)-H(13)   | 119.6    |
| C(24)-C(25)  | 1.413(5) | C(7)-C(14)-C(15)    | 121.1(3) |
| C(24)-C(31)  | 1.455(4) | C(13)-C(14)-C(7)    | 120.1(3) |
| C(25)-C(27)  | 1.366(6) | C(13)-C(14)-C(15)   | 118.8(3) |
| C(26)-H(26A) | 0.9800   | C(14)-C(15)-H(15)   | 119.9    |
| C(26)-H(26B) | 0.9800   | C(16)-C(15)-C(14)   | 120.2(3) |
| C(26)-H(26C) | 0.9800   | C(16)-C(15)-H(15)   | 119.9    |
| C(27)-H(27)  | 0.9500   | O(5)-C(16)-C(2)     | 118.6(4) |
| C(27)-C(28)  | 1.414(5) | C(15)-C(16)-O(5)    | 120.6(4) |
| C(28)-C(30)  | 1.366(5) | C(15)-C(16)-C(2)    | 120.8(3) |
| C(29)-H(29A) | 0.9800   | C(18)-C(17)-C(10)   | 118.3(3) |
| C(29)-H(29B) | 0.9800   | C(18)-C(17)-C(31)   | 118.3(3) |
| C(29)-H(29C) | 0.9800   | C(31)-C(17)-C(10)   | 123.4(3) |
| C(30)-H(30)  | 0.9500   | O(6)-C(18)-C(17)    | 116.6(3) |
| C(30)-C(31)  | 1.428(5) | O(6)-C(18)-C(22)    | 121.0(3) |
| C(32)-H(32A) | 0.9800   | C(17)-C(18)-C(22)   | 122.4(3) |
| C(32)-H(32B) | 0.9800   | O(6)-C(19)-C(32)    | 110.1(3) |
| C(32)-H(32C) | 0.9800   | C(20)-C(19)-O(6)    | 121.9(4) |
| O(11)-H(11)  | 0.8400   | C(20)-C(19)-C(32)   | 128.0(4) |
| O(11)-C(33)  | 1.400(7) | C(19)-C(20)-H(20)   | 118.7    |
| C(33)-H(33A) | 0.9900   | C(19)-C(20)-C(21)   | 122.6(4) |
| C(33)-H(33B) | 0.9900   | C(21)-C(20)-H(20)   | 118.7    |
| C(33)-C(34)  | 1.601(9) | O(7)-C(21)-C(20)    | 123.7(4) |
| C(34)-H(34A) | 0.9800   | O(7)-C(21)-C(22)    | 120.2(4) |
| C(34)-H(34B) | 0.9800   | C(20)-C(21)-C(22)   | 116.2(3) |
| C(34)-H(34C) | 0.9800   | C(18)-C(22)-C(21)   | 118.0(3) |
| O(12)-H(12D) | 0.8698   | C(23)-C(22)-C(18)   | 119.6(4) |
| O(12)-H(12E) | 0.8698   | C(23)-C(22)-C(21)   | 122.3(3) |
|              |          | O(8)-C(23)-C(22)    | 118.5(4) |
|              |          | O(8)-C(23)-C(24)    | 119.6(3) |
|              |          | C(22)-C(23)-C(24)   | 122.0(3) |
|              |          | C(23)-C(24)-C(31)   | 116.6(3) |
|              |          | C(25)-C(24)-C(23)   | 125.3(3) |
|              |          | C(25)-C(24)-C(31)   | 118.1(4) |
|              |          | O(9)-C(25)-C(24)    | 116.9(3) |
|              |          | C(27)-C(25)-O(9)    | 121.9(3) |
|              |          | C(27)-C(25)-C(24)   | 121.2(3) |
|              |          | O(9)-C(26)-H(26A)   | 109.5    |
|              |          | O(9)-C(26)-H(26B)   | 109.5    |
|              |          | O(9)-C(26)-H(26C)   | 109.5    |
|              |          | H(26A)-C(26)-H(26B) | 109.5    |
|              |          | H(26A)-C(26)-H(26C) | 109.5    |
|              |          | H(26B)-C(26)-H(26C) | 109.5    |
|              |          | C(25)-C(27)-H(27)   | 120.0    |
|              |          | C(25)-C(27)-C(28)   | 120.1(4) |
|              |          | C(28)-C(27)-H(27)   | 120.0    |
|              |          | O(10)-C(28)-C(27)   | 113.3(3) |
|              |          | O(10)-C(28)-C(30)   | 124.7(3) |
|              |          | C(30)-C(28)-C(27)   | 122.1(4) |
|              |          | O(10)-C(29)-H(29A)  | 109.5    |
|              |          | O(10)-C(29)-H(29B)  | 109.5    |
|              |          | O(10)-C(29)-H(29C)  | 109.5    |
|              |          | H(29A)-C(29)-H(29B) | 109.5    |
|              |          | H(29A)-C(29)-H(29C) | 109.5    |
|              |          | H(29B)-C(29)-H(29C) | 109.5    |
|              |          | C(28)-C(30)-H(30)   | 120.6    |
|              |          | C(28)-C(30)-C(31)   | 118.9(3) |
|              |          | C(31)-C(30)-H(30)   | 120.6    |
|              |          | C(17)-C(31)-C(24)   | 121.1(3) |
|              |          | C(17)-C(31)-C(30)   | 119.4(3) |
|              |          | C(30)-C(31)-C(24)   | 119.6(3) |
|              |          | C(19)-C(32)-H(32A)  | 109.5    |
|              |          | C(19)-C(32)-H(32B)  | 109.5    |

|                     |          |
|---------------------|----------|
| C(19)-C(32)-H(32C)  | 109.5    |
| H(32A)-C(32)-H(32B) | 109.5    |
| H(32A)-C(32)-H(32C) | 109.5    |
| H(32B)-C(32)-H(32C) | 109.5    |
| C(33)-O(11)-H(11)   | 109.5    |
| O(11)-C(33)-H(33A)  | 109.5    |
| O(11)-C(33)-H(33B)  | 109.5    |
| O(11)-C(33)-C(34)   | 110.5(5) |
| H(33A)-C(33)-H(33B) | 108.1    |
| C(34)-C(33)-H(33A)  | 109.5    |
| C(34)-C(33)-H(33B)  | 109.5    |
| C(33)-C(34)-H(34A)  | 109.5    |
| C(33)-C(34)-H(34B)  | 109.5    |
| C(33)-C(34)-H(34C)  | 109.5    |
| H(34A)-C(34)-H(34B) | 109.5    |
| H(34A)-C(34)-H(34C) | 109.5    |
| H(34B)-C(34)-H(34C) | 109.5    |
| H(12D)-O(12)-H(12E) | 104.5    |

---

**Table S4.** Hydrogen coordinates ( $\times 10^4$ ) and isotropic displacement parameters ( $\text{\AA}^2 \times 10^3$ ) for compound **1**.

|        | <i>x</i> | <i>y</i> | <i>z</i> | U(eq) |
|--------|----------|----------|----------|-------|
| H(5)   | 1124     | 3073     | 4035     | 113   |
| H(8)   | 9953     | 6050     | 11149    | 83    |
| H(5A)  | 5239     | 1440     | 4230     | 86    |
| H(6A)  | 9032     | 2631     | 5653     | 141   |
| H(6B)  | 7967     | 1358     | 5144     | 141   |
| H(6C)  | 7897     | 1689     | 6070     | 141   |
| H(9A)  | 8974     | 4941     | 6638     | 94    |
| H(9B)  | 9919     | 4486     | 7392     | 94    |
| H(9C)  | 9597     | 5760     | 7512     | 94    |
| H(12A) | 3392     | 8313     | 7704     | 93    |
| H(12B) | 3360     | 8341     | 8636     | 93    |
| H(12C) | 2201     | 7220     | 7976     | 93    |
| H(13)  | 2634     | 6549     | 6795     | 57    |
| H(15)  | 1373     | 5298     | 5492     | 68    |
| H(20)  | 5679     | 3048     | 10309    | 61    |
| H(26A) | 14373    | 9640     | 10587    | 88    |
| H(26B) | 14296    | 9627     | 11512    | 88    |
| H(26C) | 13190    | 10334    | 10993    | 88    |
| H(27)  | 12194    | 10038    | 9720     | 59    |
| H(29A) | 9364     | 9403     | 7226     | 96    |
| H(29B) | 9559     | 10774    | 7464     | 96    |
| H(29C) | 8084     | 9839     | 7732     | 96    |
| H(30)  | 8223     | 7981     | 7898     | 51    |
| H(32A) | 2655     | 2878     | 8572     | 85    |
| H(32B) | 3232     | 2017     | 9145     | 85    |
| H(32C) | 3961     | 2135     | 8344     | 85    |
| H(11)  | 5331     | 682      | 7070     | 158   |
| H(33A) | 2755     | 260      | 7282     | 98    |
| H(33B) | 2094     | -634     | 6436     | 98    |
| H(34A) | 1459     | 804      | 5800     | 212   |
| H(34B) | 3447     | 1597     | 6119     | 212   |
| H(34C) | 2028     | 1678     | 6651     | 212   |
| H(12D) | 6786     | 2809     | 7535     | 116   |
| H(12E) | 8026     | 2271     | 7845     | 116   |

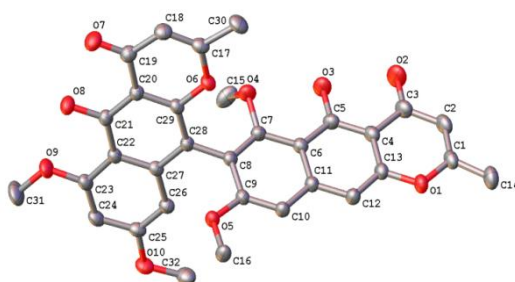

**Table S5.** Atomic coordinates ( $\times 10^4$ ) and equivalent isotropic displacement parameters ( $\text{\AA}^2 \times 10^3$ ) for compound **2**.

|       | <i>x</i> | <i>y</i> | <i>z</i> | U(eq) |
|-------|----------|----------|----------|-------|
| O(1)  | 1514(1)  | 7943(1)  | −296(1)  | 52(1) |
| O(2)  | −321(2)  | 6261(2)  | 815(1)   | 83(1) |
| O(3)  | 1416(1)  | 6393(1)  | 2125(1)  | 65(1) |
| O(4)  | 3128(1)  | 6861(1)  | 3492(1)  | 56(1) |
| O(5)  | 6528(1)  | 8549(1)  | 3352(1)  | 44(1) |
| O(6)  | 3979(1)  | 8727(1)  | 4380(1)  | 44(1) |
| O(7)  | 5557(2)  | 9065(1)  | 6811(1)  | 62(1) |
| O(8)  | 7156(1)  | 7837(1)  | 6781(1)  | 54(1) |
| O(9)  | 8624(1)  | 6512(1)  | 6671(1)  | 59(1) |
| O(10) | 8338(1)  | 5189(1)  | 4119(1)  | 57(1) |
| C(1)  | 385(2)   | 7615(2)  | −702(1)  | 52(1) |
| C(2)  | −235(2)  | 7064(2)  | −355(1)  | 61(1) |
| C(3)  | 242(2)   | 6783(2)  | 480(1)   | 58(1) |
| C(4)  | 1433(2)  | 7153(1)  | 919(1)   | 47(1) |
| C(5)  | 1990(2)  | 6960(1)  | 1746(1)  | 46(1) |
| C(6)  | 3139(2)  | 7355(1)  | 2169(1)  | 42(1) |
| C(7)  | 3741(2)  | 7262(1)  | 3024(1)  | 42(1) |
| C(8)  | 4857(2)  | 7654(1)  | 3394(1)  | 39(1) |
| C(9)  | 5431(2)  | 8178(1)  | 2922(1)  | 39(1) |
| C(10) | 4883(2)  | 8306(1)  | 2111(1)  | 42(1) |
| C(11) | 3733(2)  | 7904(1)  | 1719(1)  | 41(1) |
| C(12) | 3166(2)  | 8077(1)  | 883(1)   | 45(1) |
| C(13) | 2045(2)  | 7720(1)  | 511(1)   | 44(1) |
| C(14) | −19(2)   | 7974(2)  | −1548(1) | 69(1) |
| C(15) | 3484(3)  | 5912(2)  | 3799(1)  | 67(1) |
| C(16) | 7068(2)  | 9215(2)  | 2944(1)  | 51(1) |
| C(17) | 3504(2)  | 9330(1)  | 4808(1)  | 49(1) |
| C(18) | 4008(2)  | 9465(1)  | 5601(1)  | 52(1) |
| C(19) | 5072(2)  | 8951(1)  | 6063(1)  | 48(1) |
| C(20) | 5565(2)  | 8283(1)  | 5609(1)  | 40(1) |
| C(21) | 6606(2)  | 7734(1)  | 5982(1)  | 42(1) |
| C(22) | 7067(2)  | 7088(1)  | 5523(1)  | 40(1) |
| C(23) | 8095(2)  | 6466(1)  | 5851(1)  | 46(1) |
| C(24) | 8489(2)  | 5866(1)  | 5373(1)  | 49(1) |
| C(25) | 7872(2)  | 5835(1)  | 4531(1)  | 46(1) |
| C(26) | 6894(2)  | 6409(1)  | 4182(1)  | 42(1) |
| C(27) | 6473(2)  | 7048(1)  | 4667(1)  | 38(1) |
| C(28) | 5439(2)  | 7627(1)  | 4290(1)  | 38(1) |
| C(29) | 5007(2)  | 8204(1)  | 4769(1)  | 38(1) |
| C(30) | 2375(2)  | 9784(2)  | 4273(2)  | 63(1) |
| C(31) | 9640(2)  | 5911(2)  | 7031(2)  | 86(1) |
| C(32) | 7686(2)  | 5087(2)  | 3277(1)  | 63(1) |



**Table S6.** Bond lengths [Å] and angles [°] for compound 2.

| Bond lengths [Å] |          | Bond angles [°]     |            |
|------------------|----------|---------------------|------------|
| O(1)-C(1)        | 1.360(2) | C(1)-O(1)-C(13)     | 119.73(17) |
| O(1)-C(13)       | 1.379(2) | C(5)-O(3)-H(3)      | 109.5      |
| O(2)-C(3)        | 1.246(3) | C(7)-O(4)-C(15)     | 116.47(16) |
| O(3)-H(3)        | 0.8400   | C(9)-O(5)-C(16)     | 117.28(14) |
| O(3)-C(5)        | 1.340(2) | C(17)-O(6)-C(29)    | 119.98(15) |
| O(4)-C(7)        | 1.374(2) | C(21)-O(8)-H(8)     | 109.5      |
| O(4)-C(15)       | 1.419(3) | C(23)-O(9)-C(31)    | 117.71(18) |
| O(5)-C(9)        | 1.360(2) | C(25)-O(10)-C(32)   | 115.92(16) |
| O(5)-C(16)       | 1.432(2) | O(1)-C(1)-C(14)     | 110.4(2)   |
| O(6)-C(17)       | 1.356(2) | C(2)-C(1)-O(1)      | 122.6(2)   |
| O(6)-C(29)       | 1.377(2) | C(2)-C(1)-C(14)     | 127.1(2)   |
| O(7)-C(19)       | 1.254(2) | C(1)-C(2)-H(2)      | 119.0      |
| O(8)-H(8)        | 0.8400   | C(1)-C(2)-C(3)      | 122.01(19) |
| O(8)-C(21)       | 1.341(2) | C(3)-C(2)-H(2)      | 119.0      |
| O(9)-C(23)       | 1.365(2) | O(2)-C(3)-C(2)      | 123.0(2)   |
| O(9)-C(31)       | 1.417(3) | O(2)-C(3)-C(4)      | 121.5(2)   |
| O(10)-C(25)      | 1.367(2) | C(2)-C(3)-C(4)      | 115.5(2)   |
| O(10)-C(32)      | 1.427(3) | C(5)-C(4)-C(3)      | 121.37(19) |
| C(1)-C(2)        | 1.330(3) | C(5)-C(4)-C(13)     | 119.13(17) |
| C(1)-C(14)       | 1.482(3) | C(13)-C(4)-C(3)     | 119.50(19) |
| C(2)-H(2)        | 0.9500   | O(3)-C(5)-C(4)      | 118.78(17) |
| C(2)-C(3)        | 1.435(3) | O(3)-C(5)-C(6)      | 120.80(18) |
| C(3)-C(4)        | 1.450(3) | C(4)-C(5)-C(6)      | 120.43(17) |
| C(4)-C(5)        | 1.404(3) | C(5)-C(6)-C(7)      | 124.63(17) |
| C(4)-C(13)       | 1.405(3) | C(5)-C(6)-C(11)     | 117.98(17) |
| C(5)-C(6)        | 1.418(3) | C(11)-C(6)-C(7)     | 117.38(16) |
| C(6)-C(7)        | 1.435(3) | O(4)-C(7)-C(6)      | 118.88(16) |
| C(6)-C(11)       | 1.429(2) | C(8)-C(7)-O(4)      | 119.08(16) |
| C(7)-C(8)        | 1.367(3) | C(8)-C(7)-C(6)      | 121.68(16) |
| C(8)-C(9)        | 1.424(2) | C(7)-C(8)-C(9)      | 119.29(16) |
| C(8)-C(28)       | 1.492(2) | C(7)-C(8)-C(28)     | 121.59(16) |
| C(9)-C(10)       | 1.363(2) | C(9)-C(8)-C(28)     | 118.86(16) |
| C(10)-H(10)      | 0.9500   | O(5)-C(9)-C(8)      | 114.41(15) |
| C(10)-C(11)      | 1.412(3) | O(5)-C(9)-C(10)     | 124.42(16) |
| C(11)-C(12)      | 1.415(3) | C(10)-C(9)-C(8)     | 121.15(17) |
| C(12)-H(12)      | 0.9500   | C(9)-C(10)-H(10)    | 119.8      |
| C(12)-C(13)      | 1.355(3) | C(9)-C(10)-C(11)    | 120.31(17) |
| C(14)-H(14A)     | 0.9800   | C(11)-C(10)-H(10)   | 119.8      |
| C(14)-H(14B)     | 0.9800   | C(10)-C(11)-C(6)    | 120.15(16) |
| C(14)-H(14C)     | 0.9800   | C(10)-C(11)-C(12)   | 119.13(16) |
| C(15)-H(15A)     | 0.9800   | C(12)-C(11)-C(6)    | 120.70(17) |
| C(15)-H(15B)     | 0.9800   | C(11)-C(12)-H(12)   | 120.4      |
| C(15)-H(15C)     | 0.9800   | C(13)-C(12)-C(11)   | 119.21(18) |
| C(16)-H(16A)     | 0.9800   | C(13)-C(12)-H(12)   | 120.4      |
| C(16)-H(16B)     | 0.9800   | O(1)-C(13)-C(4)     | 120.68(17) |
| C(16)-H(16C)     | 0.9800   | C(12)-C(13)-O(1)    | 116.86(17) |
| C(17)-C(18)      | 1.330(3) | C(12)-C(13)-C(4)    | 122.46(18) |
| C(17)-C(30)      | 1.486(3) | C(1)-C(14)-H(14A)   | 109.5      |
| C(18)-H(18)      | 0.9500   | C(1)-C(14)-H(14B)   | 109.5      |
| C(18)-C(19)      | 1.432(3) | C(1)-C(14)-H(14C)   | 109.5      |
| C(19)-C(20)      | 1.455(3) | H(14A)-C(14)-H(14B) | 109.5      |
| C(20)-C(21)      | 1.401(3) | H(14A)-C(14)-H(14C) | 109.5      |
| C(20)-C(29)      | 1.404(3) | H(14B)-C(14)-H(14C) | 109.5      |
| C(21)-C(22)      | 1.420(3) | O(4)-C(15)-H(15A)   | 109.5      |
| C(22)-C(23)      | 1.436(3) | O(4)-C(15)-H(15B)   | 109.5      |
| C(22)-C(27)      | 1.432(2) | O(4)-C(15)-H(15C)   | 109.5      |
| C(23)-C(24)      | 1.360(3) | H(15A)-C(15)-H(15B) | 109.5      |
| C(24)-H(24)      | 0.9500   | H(15A)-C(15)-H(15C) | 109.5      |
| C(24)-C(25)      | 1.413(3) | H(15B)-C(15)-H(15C) | 109.5      |
| C(25)-C(26)      | 1.362(3) | O(5)-C(16)-H(16A)   | 109.5      |

|              |          |                     |            |
|--------------|----------|---------------------|------------|
| C(26)-H(26)  | 0.9500   | O(5)-C(16)-H(16B)   | 109.5      |
| C(26)-C(27)  | 1.419(2) | O(5)-C(16)-H(16C)   | 109.5      |
| C(27)-C(28)  | 1.420(2) | H(16A)-C(16)-H(16B) | 109.5      |
| C(28)-C(29)  | 1.366(2) | H(16A)-C(16)-H(16C) | 109.5      |
| C(30)-H(30A) | 0.9800   | H(16B)-C(16)-H(16C) | 109.5      |
| C(30)-H(30B) | 0.9800   | O(6)-C(17)-C(30)    | 110.67(18) |
| C(30)-H(30C) | 0.9800   | C(18)-C(17)-O(6)    | 122.62(18) |
| C(31)-H(31A) | 0.9800   | C(18)-C(17)-C(30)   | 126.71(19) |
| C(31)-H(31B) | 0.9800   | C(17)-C(18)-H(18)   | 119.1      |
| C(31)-H(31C) | 0.9800   | C(17)-C(18)-C(19)   | 121.83(18) |
| C(32)-H(32A) | 0.9800   | C(19)-C(18)-H(18)   | 119.1      |
| C(32)-H(32B) | 0.9800   | O(7)-C(19)-C(18)    | 122.77(18) |
| C(32)-H(32C) | 0.9800   | O(7)-C(19)-C(20)    | 121.59(18) |
|              |          | C(18)-C(19)-C(20)   | 115.64(17) |
|              |          | C(21)-C(20)-C(19)   | 121.90(17) |
|              |          | C(21)-C(20)-C(29)   | 118.79(16) |
|              |          | C(29)-C(20)-C(19)   | 119.28(17) |
|              |          | O(8)-C(21)-C(20)    | 118.42(16) |
|              |          | O(8)-C(21)-C(22)    | 120.93(16) |
|              |          | C(20)-C(21)-C(22)   | 120.66(17) |
|              |          | C(21)-C(22)-C(23)   | 124.97(17) |
|              |          | C(21)-C(22)-C(27)   | 118.14(16) |
|              |          | C(27)-C(22)-C(23)   | 116.89(16) |
|              |          | O(9)-C(23)-C(22)    | 115.14(17) |
|              |          | C(24)-C(23)-O(9)    | 123.12(17) |
|              |          | C(24)-C(23)-C(22)   | 121.73(18) |
|              |          | C(23)-C(24)-H(24)   | 120.0      |
|              |          | C(23)-C(24)-C(25)   | 119.95(18) |
|              |          | C(25)-C(24)-H(24)   | 120.0      |
|              |          | O(10)-C(25)-C(24)   | 114.43(17) |
|              |          | C(26)-C(25)-O(10)   | 124.33(18) |
|              |          | C(26)-C(25)-C(24)   | 121.23(17) |
|              |          | C(25)-C(26)-H(26)   | 120.1      |
|              |          | C(25)-C(26)-C(27)   | 119.87(18) |
|              |          | C(27)-C(26)-H(26)   | 120.1      |
|              |          | C(26)-C(27)-C(22)   | 120.32(16) |
|              |          | C(26)-C(27)-C(28)   | 118.87(16) |
|              |          | C(28)-C(27)-C(22)   | 120.80(16) |
|              |          | C(27)-C(28)-C(8)    | 121.81(16) |
|              |          | C(29)-C(28)-C(8)    | 119.79(15) |
|              |          | C(29)-C(28)-C(27)   | 118.34(16) |
|              |          | O(6)-C(29)-C(20)    | 120.59(15) |
|              |          | C(28)-C(29)-O(6)    | 116.23(16) |
|              |          | C(28)-C(29)-C(20)   | 123.18(16) |
|              |          | C(17)-C(30)-H(30A)  | 109.5      |
|              |          | C(17)-C(30)-H(30B)  | 109.5      |
|              |          | C(17)-C(30)-H(30C)  | 109.5      |
|              |          | H(30A)-C(30)-H(30B) | 109.5      |
|              |          | H(30A)-C(30)-H(30C) | 109.5      |
|              |          | H(30B)-C(30)-H(30C) | 109.5      |
|              |          | O(9)-C(31)-H(31A)   | 109.5      |
|              |          | O(9)-C(31)-H(31B)   | 109.5      |
|              |          | O(9)-C(31)-H(31C)   | 109.5      |
|              |          | H(31A)-C(31)-H(31B) | 109.5      |
|              |          | H(31A)-C(31)-H(31C) | 109.5      |
|              |          | H(31B)-C(31)-H(31C) | 109.5      |
|              |          | O(10)-C(32)-H(32A)  | 109.5      |
|              |          | O(10)-C(32)-H(32B)  | 109.5      |
|              |          | O(10)-C(32)-H(32C)  | 109.5      |
|              |          | H(32A)-C(32)-H(32B) | 109.5      |
|              |          | H(32A)-C(32)-H(32C) | 109.5      |
|              |          | H(32B)-C(32)-H(32C) | 109.5      |
|              |          | C(20)-C(21)-C(22)   | 120.66(17) |

|                     |            |
|---------------------|------------|
| C(21)-C(22)-C(23)   | 124.97(17) |
| C(21)-C(22)-C(27)   | 118.14(16) |
| C(27)-C(22)-C(23)   | 116.89(16) |
| O(9)-C(23)-C(22)    | 115.14(17) |
| C(24)-C(23)-O(9)    | 123.12(17) |
| C(24)-C(23)-C(22)   | 121.73(18) |
| C(23)-C(24)-H(24)   | 120.0      |
| C(23)-C(24)-C(25)   | 119.95(18) |
| C(25)-C(24)-H(24)   | 120.0      |
| O(10)-C(25)-C(24)   | 114.43(17) |
| C(26)-C(25)-O(10)   | 124.33(18) |
| C(26)-C(25)-C(24)   | 121.23(17) |
| C(25)-C(26)-H(26)   | 120.1      |
| C(25)-C(26)-C(27)   | 119.87(18) |
| C(27)-C(26)-H(26)   | 120.1      |
| C(26)-C(27)-C(22)   | 120.32(16) |
| C(26)-C(27)-C(28)   | 118.87(16) |
| C(28)-C(27)-C(22)   | 120.80(16) |
| C(27)-C(28)-C(8)    | 121.81(16) |
| C(29)-C(28)-C(8)    | 119.79(15) |
| C(29)-C(28)-C(27)   | 118.34(16) |
| O(6)-C(29)-C(20)    | 120.59(15) |
| C(28)-C(29)-O(6)    | 116.23(16) |
| C(28)-C(29)-C(20)   | 123.18(16) |
| C(17)-C(30)-H(30A)  | 109.5      |
| C(17)-C(30)-H(30B)  | 109.5      |
| C(17)-C(30)-H(30C)  | 109.5      |
| H(30A)-C(30)-H(30B) | 109.5      |
| H(30A)-C(30)-H(30C) | 109.5      |
| H(30B)-C(30)-H(30C) | 109.5      |
| O(9)-C(31)-H(31A)   | 109.5      |
| O(9)-C(31)-H(31B)   | 109.5      |
| O(9)-C(31)-H(31C)   | 109.5      |
| H(31A)-C(31)-H(31B) | 109.5      |
| H(31A)-C(31)-H(31C) | 109.5      |
| H(31B)-C(31)-H(31C) | 109.5      |
| O(10)-C(32)-H(32A)  | 109.5      |
| O(10)-C(32)-H(32B)  | 109.5      |
| O(10)-C(32)-H(32C)  | 109.5      |
| H(32A)-C(32)-H(32B) | 109.5      |
| H(32A)-C(32)-H(32C) | 109.5      |
| H(32B)-C(32)-H(32C) | 109.5      |

---

**Table S7.** Hydrogen coordinates ( $\times 10^4$ ) and isotropic displacement parameters ( $\text{\AA}^2 \times 10^3$ ) for compound **2**.

|        | <i>x</i> | <i>y</i> | <i>z</i> | U(eq) |
|--------|----------|----------|----------|-------|
| H(3)   | 745      | 6227     | 1798     | 97    |
| H(8)   | 6758     | 8222     | 6968     | 81    |
| H(2)   | −1017    | 6849     | −669     | 74    |
| H(10)  | 5277     | 8666     | 1809     | 51    |
| H(12)  | 3566     | 8439     | 585      | 54    |
| H(14A) | −145     | 8681     | −1551    | 104   |
| H(14B) | −776     | 7653     | −1855    | 104   |
| H(14C) | 595      | 7826     | −1795    | 104   |
| H(15A) | 3193     | 5434     | 3361     | 101   |
| H(15B) | 3141     | 5764     | 4226     | 101   |
| H(15C) | 4364     | 5880     | 4023     | 101   |
| H(16A) | 7229     | 8878     | 2497     | 76    |
| H(16B) | 7825     | 9461     | 3324     | 76    |
| H(16C) | 6519     | 9762     | 2730     | 76    |
| H(18)  | 3653     | 9915     | 5867     | 62    |
| H(24)  | 9178     | 5468     | 5605     | 59    |
| H(26)  | 6493     | 6381     | 3614     | 50    |
| H(30A) | 2522     | 10081    | 3805     | 95    |
| H(30B) | 2109     | 10286    | 4574     | 95    |
| H(30C) | 1750     | 9284     | 4086     | 95    |
| H(31A) | 10293    | 6100     | 6829     | 129   |
| H(31B) | 9424     | 5228     | 6891     | 129   |
| H(31C) | 9907     | 5990     | 7619     | 129   |
| H(32A) | 7795     | 5674     | 2990     | 94    |
| H(32B) | 6829     | 4998     | 3199     | 94    |
| H(32C) | 7987     | 4519     | 3064     | 94    |
